# Supplementary material for: The exploration of Kemp's triacid (KTA) as the core for the synthesis of 3-fold symmetric 23-cyclophane, 22-cyclophane and novel linker directed designs
Source: Royal Society of Chemistry journal article supplement (doi:10.1039/c3ra44327b), 2013-11-06
Supplement: c3ra44327b.pdf [file c3ra44327b.pdf]

### Electronic Supplementary Information

**The Exploration of Kemp's Tri Acid(KTA) as a Core for the Synthesis of 3- Fold Symmetric 2<sub>3</sub>-Cyclophane, 2<sub>2</sub>-Cyclophane and Novel Linker Directed Designs**

**Santhosh Reddy Naini,<sup>[a]</sup> Subramania Ranganathan,<sup>\*[a]</sup> Jhillu Singh Yadav,<sup>\*[a]</sup> K. V. S. Ramakrishna,<sup>\*[b]</sup> G. Gayatri<sup>[c]</sup>, G. Narahari Sastry<sup>\*[c]</sup>, K. Basu Roy<sup>[d]</sup>, N. Shamala<sup>\*[d]</sup>**

**Compound-3, Figure-S1**

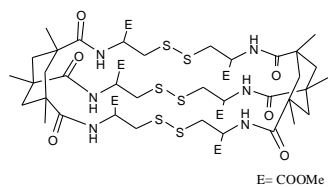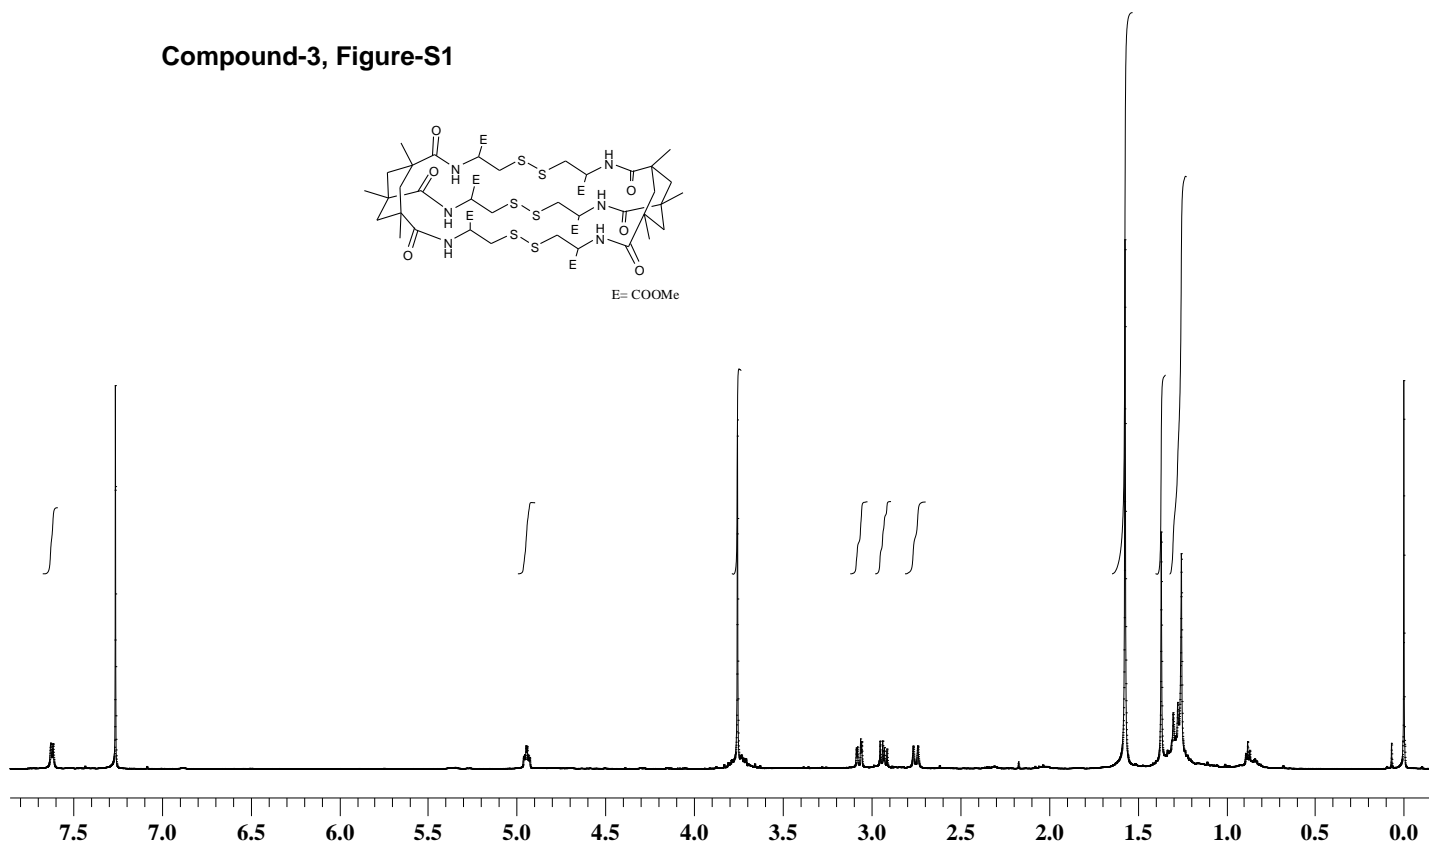

Figure-S1:  $^1\text{H}$  NMR of compound **3**(2<sub>3</sub>-Cyclophane) in  $\text{CDCl}_3$ , 500MHz

Compound-3, Figure-S2

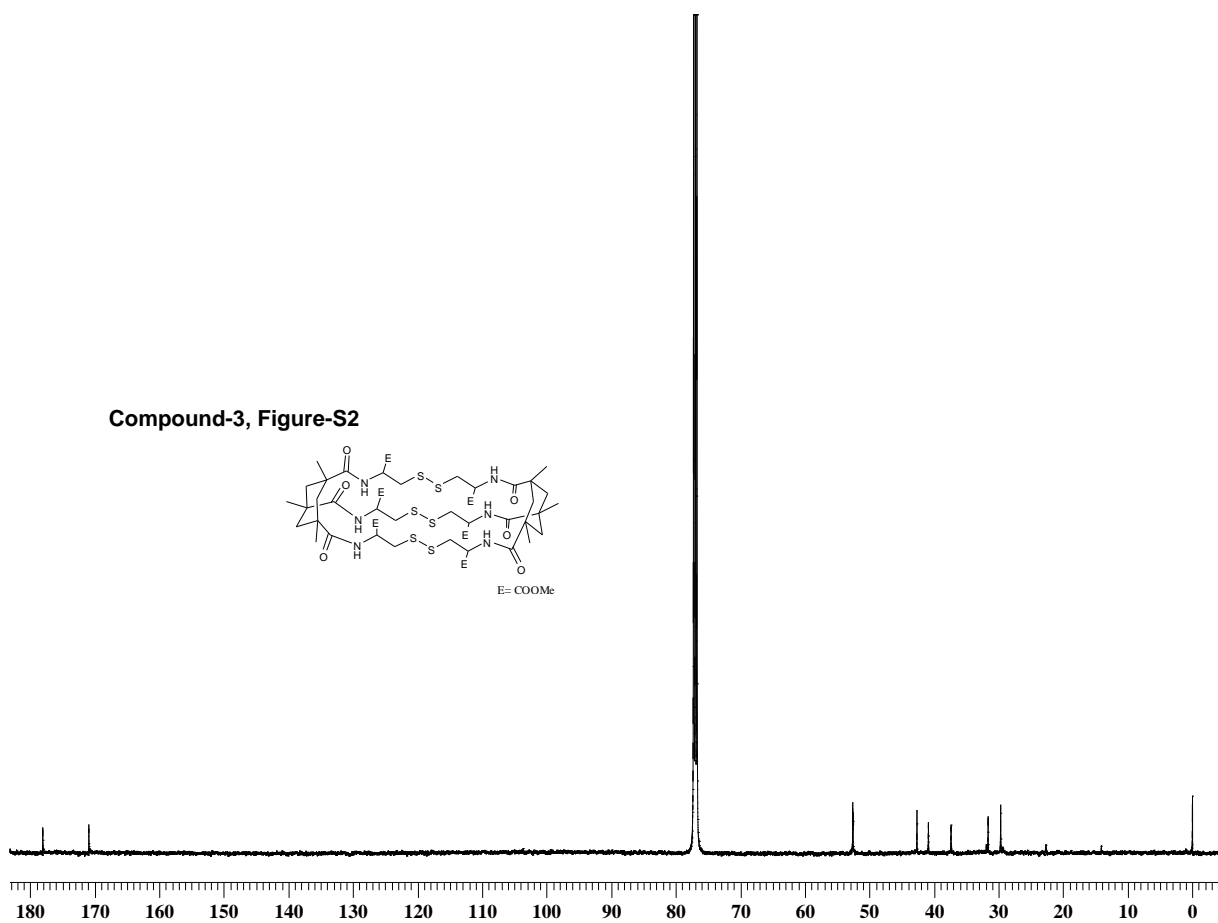

Figure-S2:  $^{13}\text{C}$  NMR of compound 3(2<sub>3</sub>-Cyclophane) in  $\text{CDCl}_3$ , 125MHz

Compound-4, Figure-S3

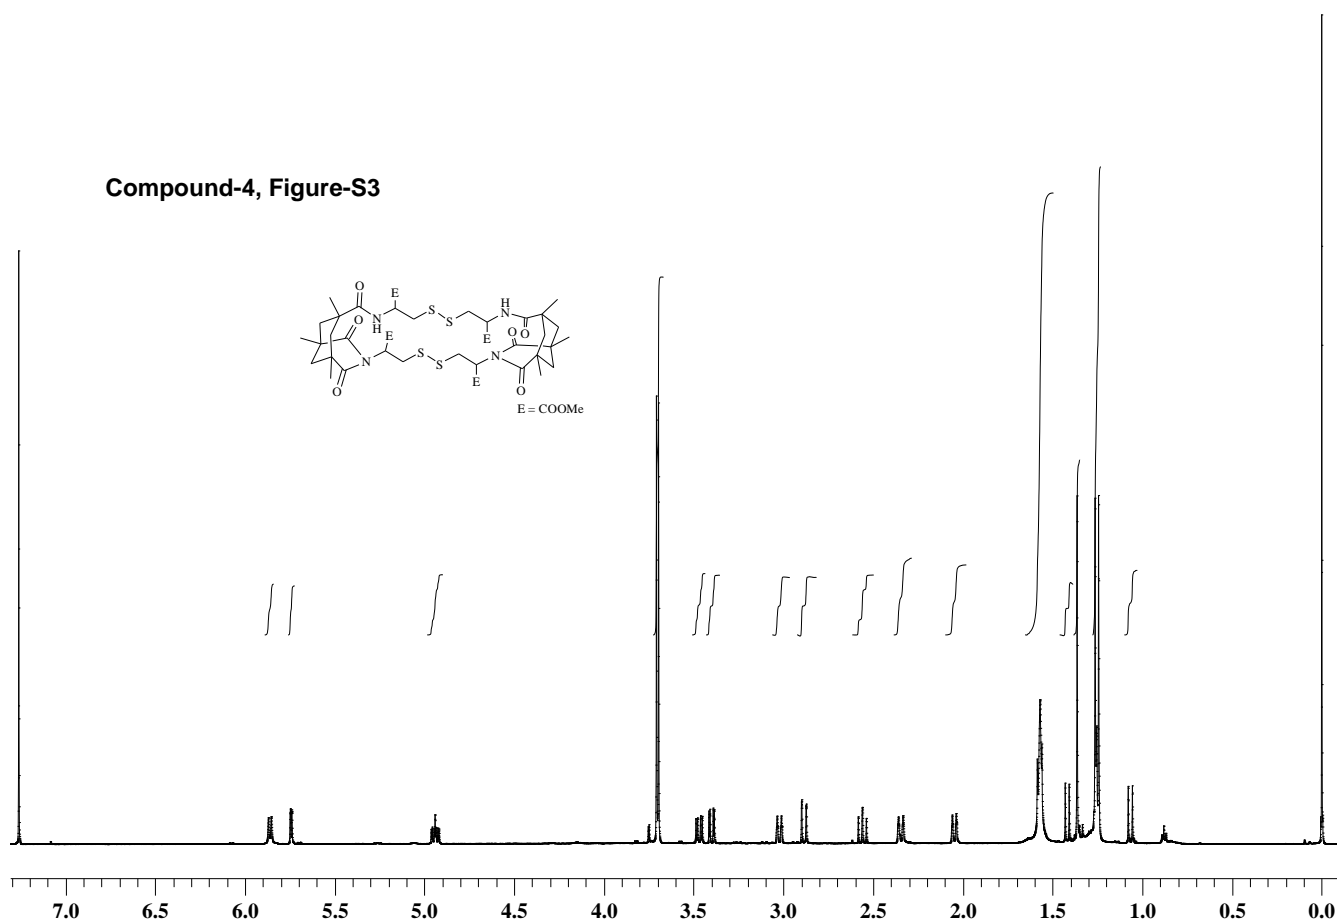

Figure-S3:  $^1\text{H}$  NMR of compound 4(2<sub>2</sub>-Cyclophane) in  $\text{CDCl}_3$ , 600MHz

Compound-4, Figure-S4

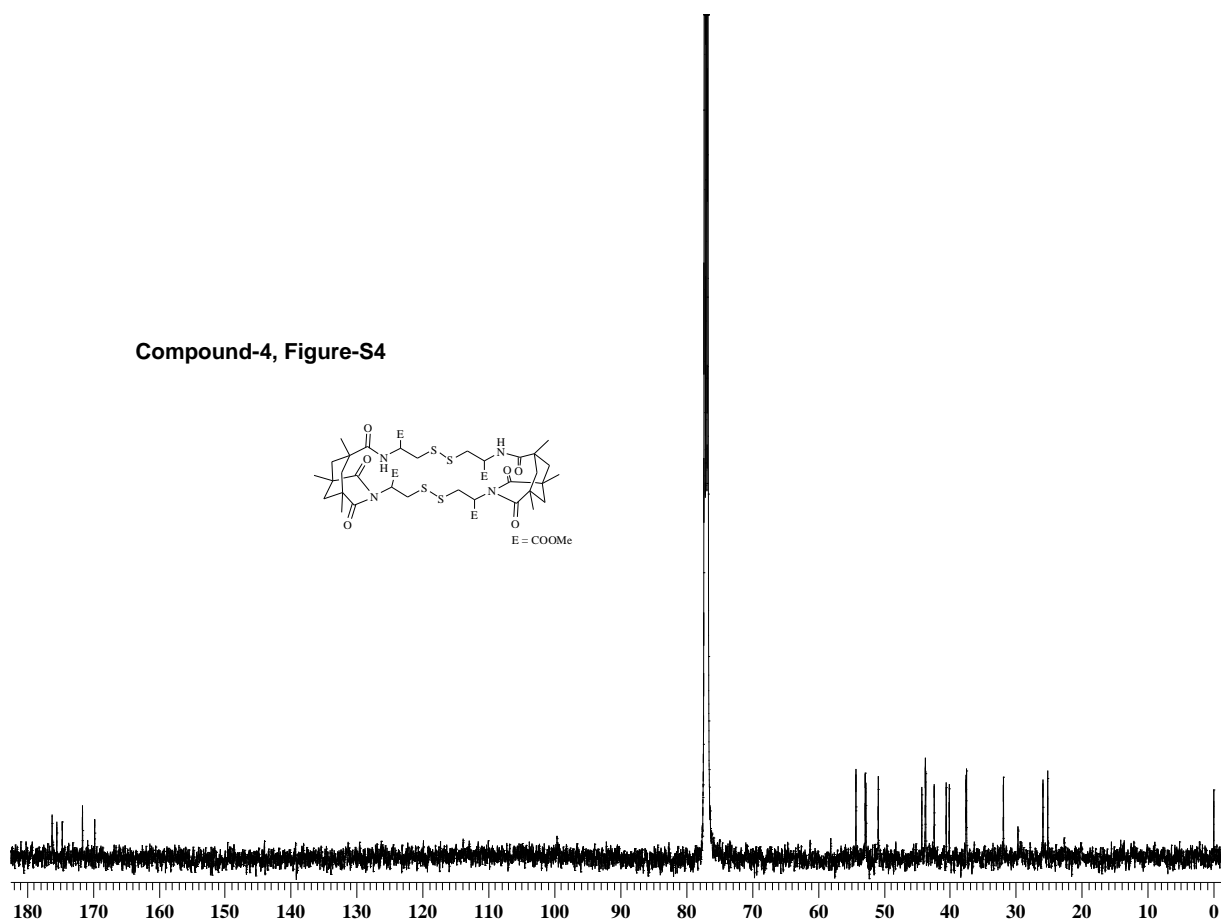

Figure-S4:  $^{13}\text{C}$  NMR of compound 4(2-Cyclophane) in  $\text{CDCl}_3$ , 125MHz

Compound-7, Figure-S5

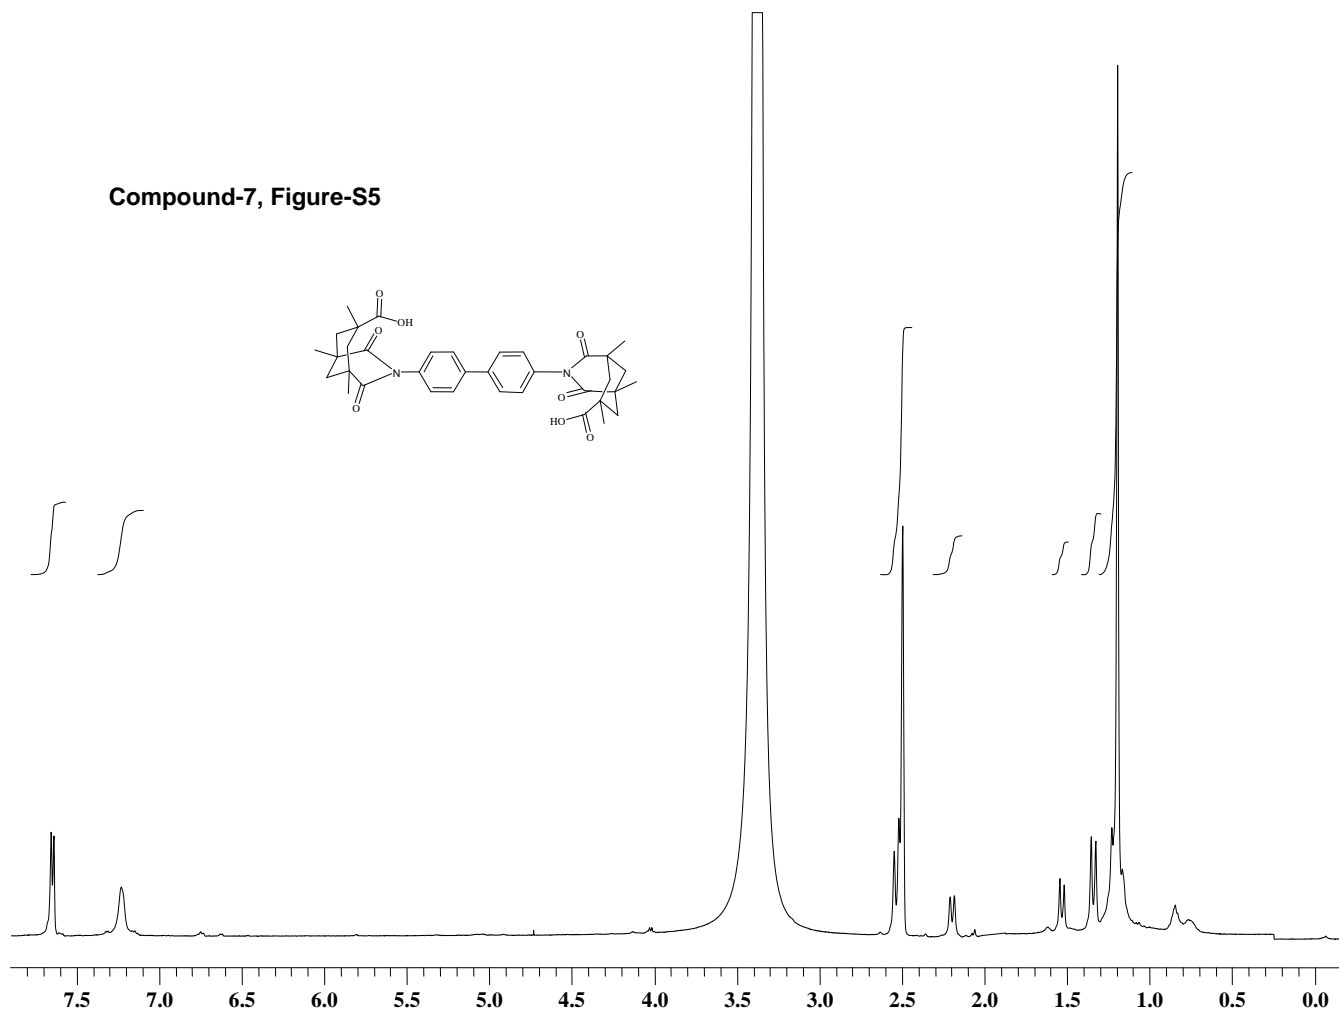

Figure-S5: <sup>1</sup>H NMR of compound 7 (**Kemp-Benzidine**) in DMSO-d<sub>6</sub>, 500MHz

Compound-7, FigureS6

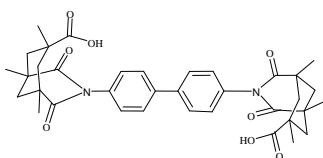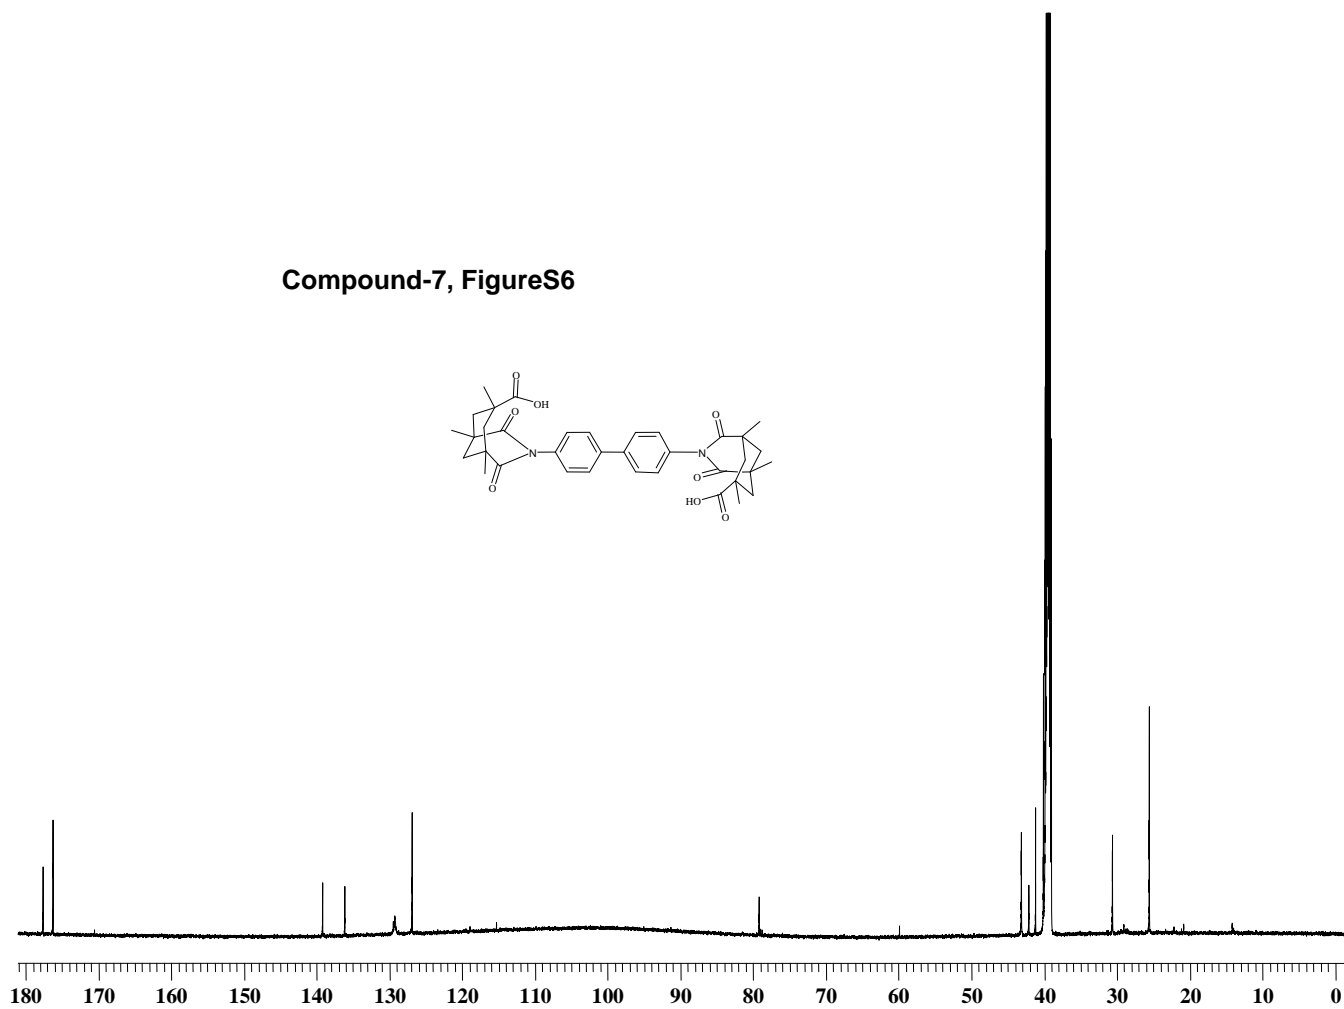

Figure-S6:  $^{13}\text{C}$  NMR of compound 7 (Kemp-Benzidine) in  $\text{DMSO-d}_6$ , 125 MHz

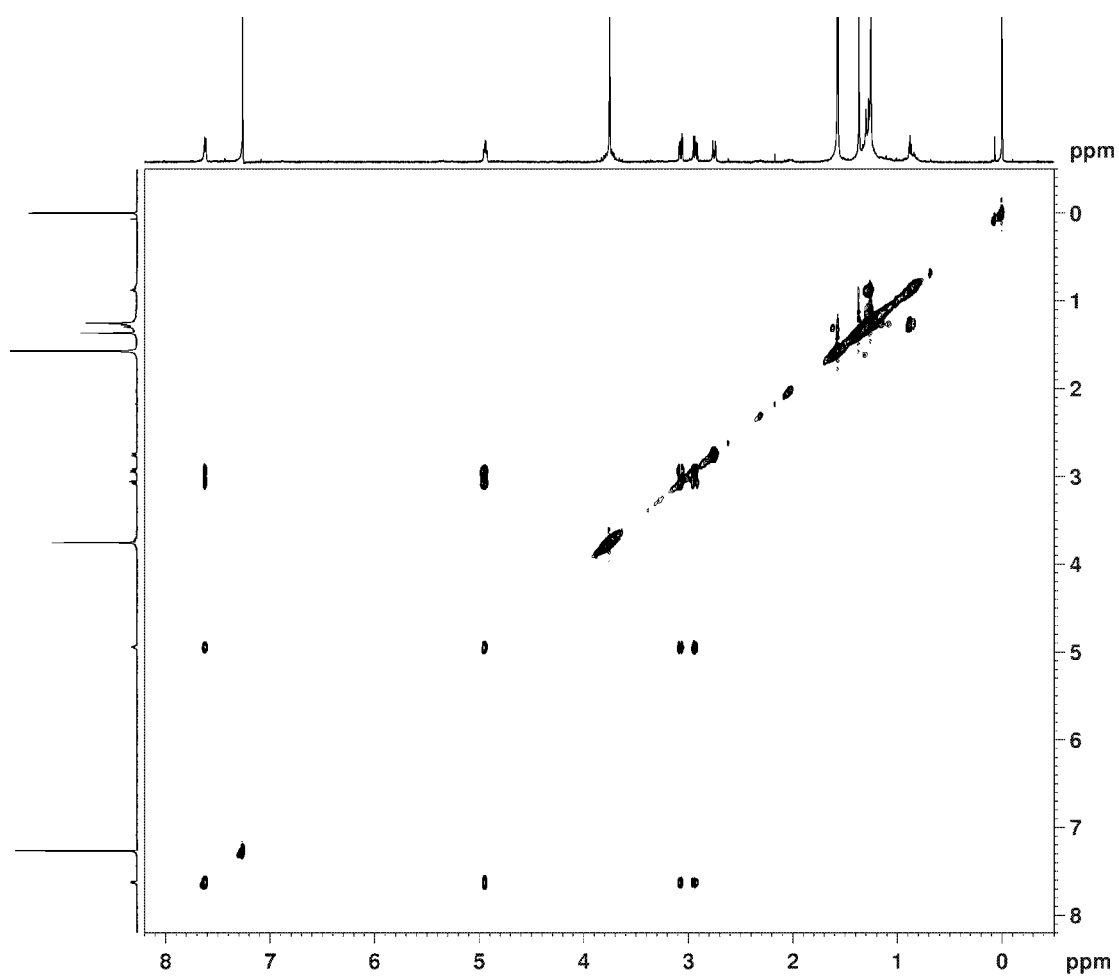

Figure-S7: The TOCSY spectrum of 2<sub>3</sub> cyclophane(3)



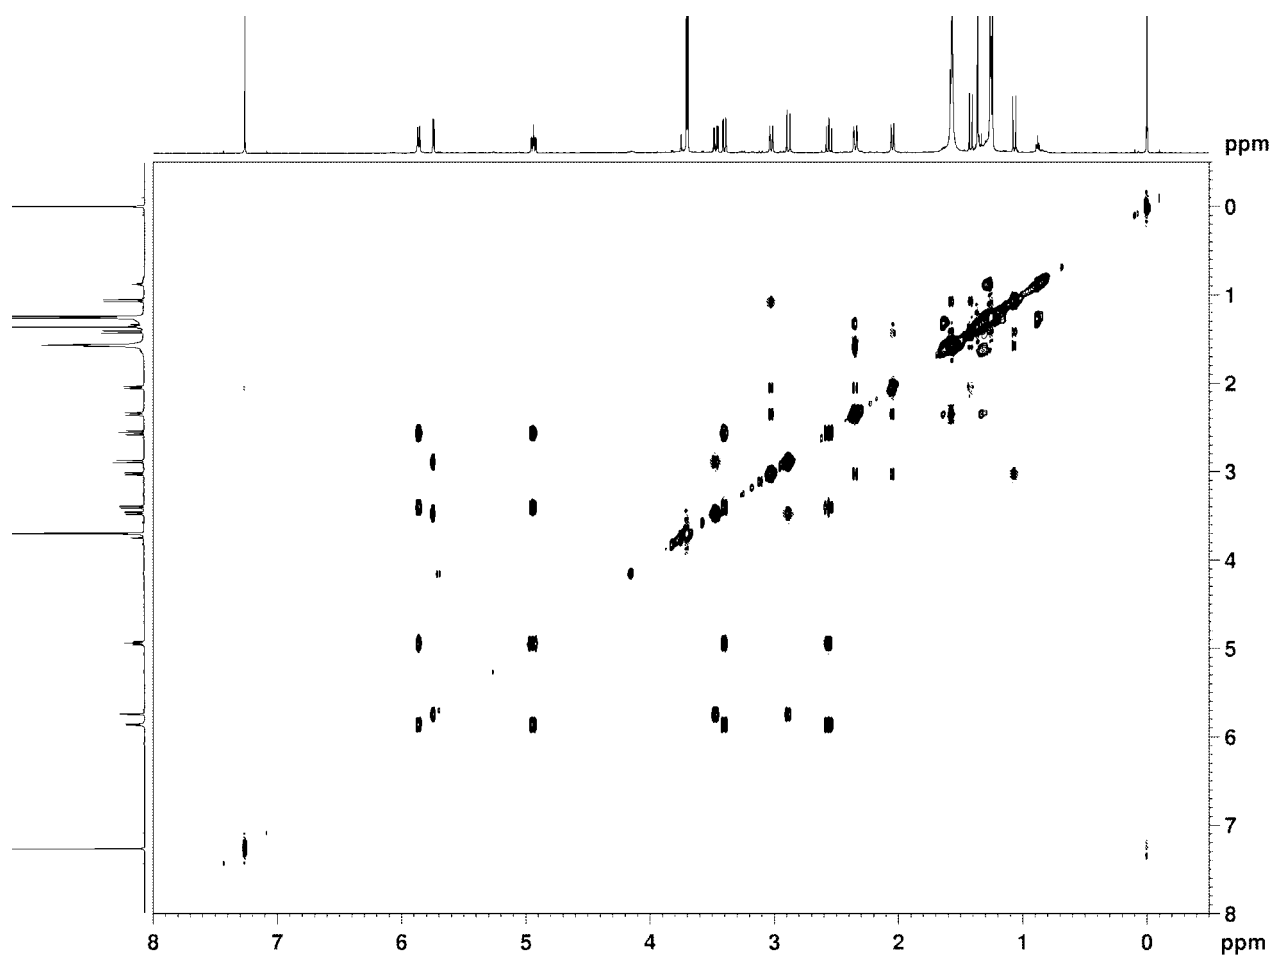

Figure-S8: The TOCSY spectrum of 2<sub>2</sub> cyclophane(4)

## Crystal data and structure refinement parameters for Kemp-benzidine (7)

|                                                                                 |                                                                                    |
|---------------------------------------------------------------------------------|------------------------------------------------------------------------------------|
| Empirical formula                                                               | C <sub>18</sub> H <sub>20</sub> NO <sub>4</sub> + C <sub>2</sub> H <sub>6</sub> OS |
| Crystal habit                                                                   | Rectangular                                                                        |
| Crystal size (mm)                                                               | (0.56 × 0.45 × 0.13)                                                               |
| Crystallizing solvent                                                           | DMSO                                                                               |
| Space group                                                                     | <i>P</i> 2 <sub>1</sub> / <i>c</i>                                                 |
| <i>a</i> (Å)                                                                    | 7.585(2)                                                                           |
| <i>b</i> (Å)                                                                    | 18.384(3)                                                                          |
| <i>c</i> (Å)                                                                    | 14.401(3)                                                                          |
| β (°)                                                                           | 102.535(8)                                                                         |
| Volume (Å <sup>3</sup> )                                                        | 1960.1(6)                                                                          |
| <i>Z</i>                                                                        | 2                                                                                  |
| Molecules/asymmetric unit                                                       | 1/2                                                                                |
| Co-crystallized solvent                                                         | C <sub>2</sub> H <sub>6</sub> OS (DMSO)                                            |
| Molecular weight                                                                | 644.71 + 156.27                                                                    |
| Calculated density (g/cm <sup>3</sup> )                                         | 1.330                                                                              |
| F (000)                                                                         | 836                                                                                |
| Radiation                                                                       | MoK <sub>α</sub> (0.71073 Å)                                                       |
| Temperature (K)                                                                 | 200 (2)                                                                            |
| 2θ max. (°)                                                                     | 61.36                                                                              |
| Measured reflections                                                            | 23014                                                                              |
| R <sub>int</sub>                                                                | 0.0366                                                                             |
| Unique reflections                                                              | 6011                                                                               |
| Observed reflection<br>[  F  > 4σ(F) ]                                          | 4682                                                                               |
| Final R (%) / wR2 (%)                                                           | 5.34 / 16.43                                                                       |
| Goodness-of-fit on F <sup>2</sup> (S)                                           | 0.961                                                                              |
| Δρ <sub>max</sub> (e.Å <sup>-3</sup> ) / Δρ <sub>min</sub> (e.Å <sup>-3</sup> ) | 0.53 / -0.37                                                                       |
| No. of restraints/parameters                                                    | 0/301                                                                              |
| Data-to-parameter ratio                                                         | 15.55: 1                                                                           |

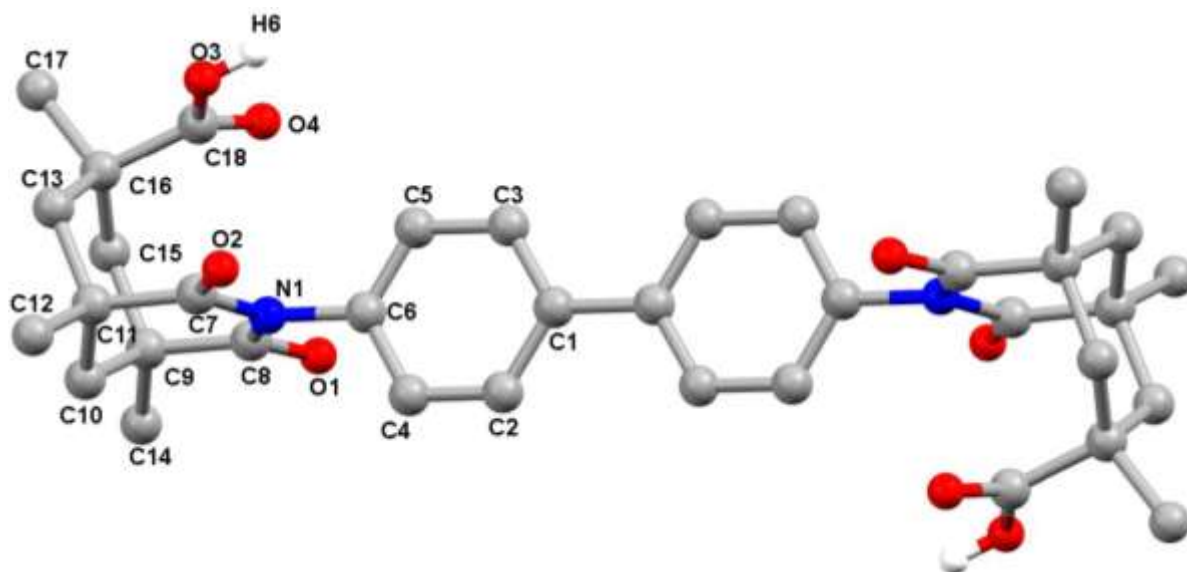

Crystal structure of Kemp-benzidine(7)

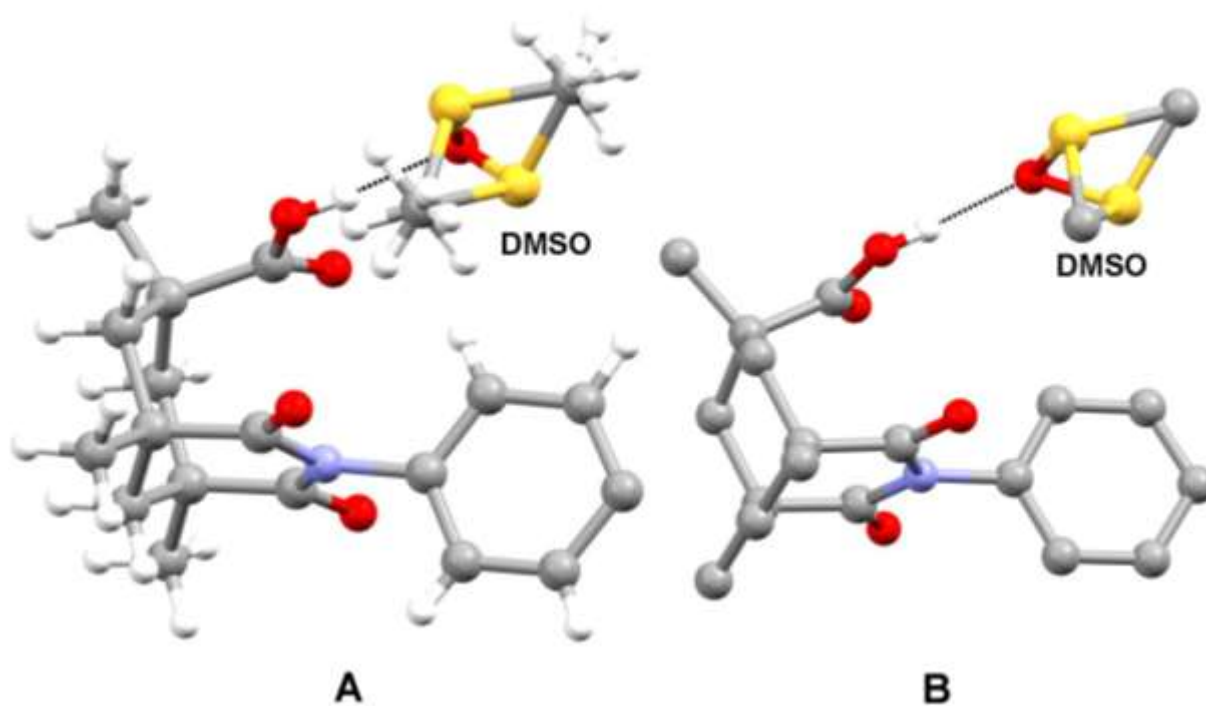

Crystallographic asymmetric unit of Kemp-benzidine(7).

A: With hydrogen atoms.

B: Without hydrogen atoms.

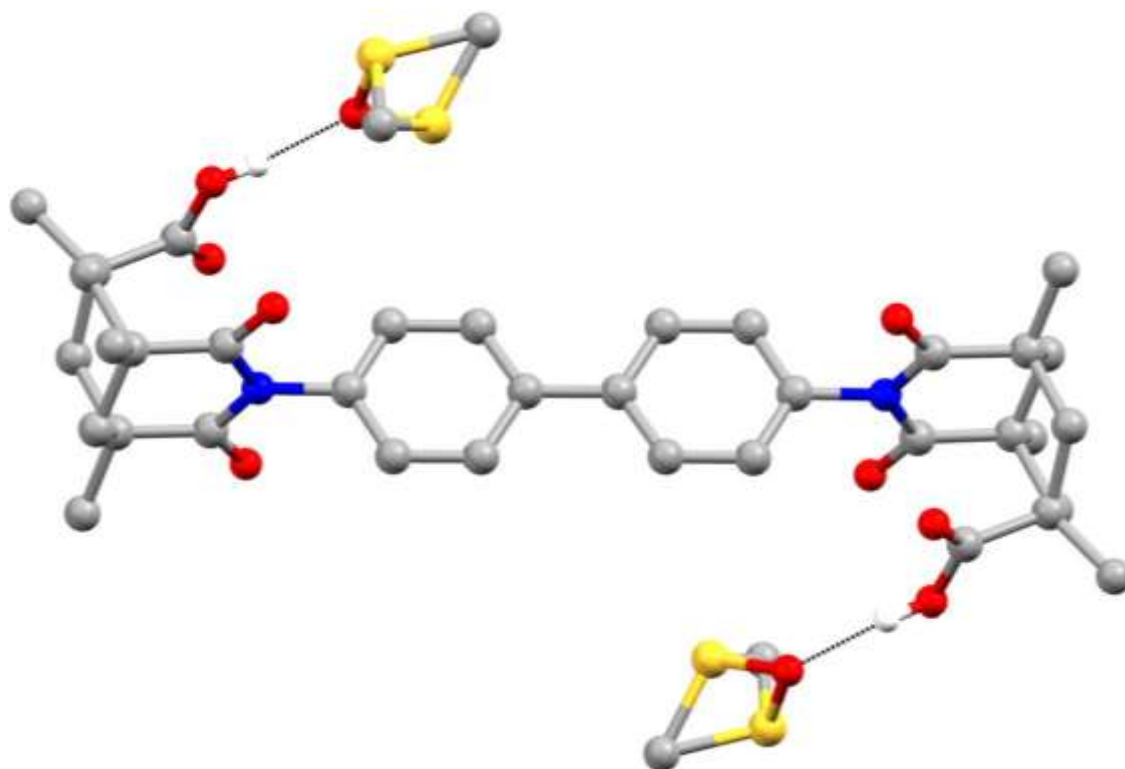

Crystal structure of Kemp-benzidine(7) with co-crystallized solvent (DMSO) molecules
